# Supplementary material for: Recent Loss of Vitamin C Biosynthesis Ability in Bats
Source: PLoS One. 2011 Nov 1;6(11):e27114. doi: 10.1371/journal.pone.0027114 (PMC3206078; doi:10.1371/journal.pone.0027114)
Supplement: Table S1 — Bat GULO genes with taxa information. (XLS) [file pone.0027114.s001.xls]

## Sheet: Sheet1
Supplementary table S1. Bat GULO genes with taxa information.
	Family	Genus	Common name	Pseudogenization information	exon-3	exon-4	exon-5	exon6	exon-7	exon-8	Accession numbers	Location
Eonycteris spelaea	Pteropodinae	Eonycteris	Lesser dawn bat		√	√	√	√	√	√	JN377498	Yunnan, China
Rousettus leschenaultii		Rousettus	Leschenault's rousette		√	√	√	√	√	√	HQ415789	Guangxi, China
Rousettus aegyptiacus			Egyptian rousette		√	√	√	√	√	√	JN377499	Okoroba, Cameroon
Pteropus rodricensis		Pteropus	Rodriguez flying fox		√	√	√	√	√	√	JN377500	Australia
Pteropus conspicillatus			Spectacled flying fox	exon-6, 2 bp deletion	√	√	√	√	√	√	JN377506	Australia
Pteropus pumilus			Little golden-mantled flying fox	exon-3, 2 bp insertion	√	√	√	√	√	√	JN377507	Australia
Pteropus vampyrus			Large flying fox	exon-3, 2 bp insertion and 1 bp deletion	√	√	√	√	√	√	JN377508	Australia
Hipposideros armiger	Hipposideridae	Hipposideros	Great roundleaf bat		√	√	√	√	√	√	HQ415790	Anhui, China
Hipposideros pratti			Pratt's roundleaf bat		NA	√	√	√	√	√	JN377504	Guangxi, China
Hipposideros bicolor			Bicolored roundleaf bat	exon-7, 6 bp insertion with a premature stop codon	NA	√	√	√	√	√	JN377509	Guangdong, China
Hipposideros speoris			Schneider's roundleaf bat	exon-6, a premature stop codon	NA	√	√	√	√	√	JN377510	Trichy, India
Hipposideros ater			Dusky roundleaf bat		NA	√	√	√	√	√	JN377505	Tirunelveli, India
Coelops frithii		Coelops	East Asian tailless leaf-nosed bat	exon-4, 11 bp deletion	NA	√	√	√	√	√	JN377511	Fujian, China
Rhinolophus ferrumequinum	Rhinolophidae	Rhinolophus	Greater horseshoe bat		√	√	√	√	√	√	JN377503	Beijing, China
Megaderma lyra	Megadermatidae	Megaderma	Greater false vampire bat		√	√	√	√	√	√	JN377501	Bac Kan, Vietnam
Rhinopoma hardwickii	Rhinopomatidae	Rhinopoma	Lesser mouse-tailed bat		√	√	√	√	√	√	JN377502	Tirunelveli, India
NA: not acquired, PCR negative; √: PCR positive
